# Supplementary material for: A biomimetic Setaria viridis-inspired electrode with polyaniline nanowire arrays aligned on MoO3@polypyrrole core–shell nanobelts
Source: Royal Society of Chemistry journal article supplement (doi:10.1039/c8ta04218g), 2018-01-01
Supplement: c8ta04218g1.pdf [file c8ta04218g1.pdf]

## **A biomimetic *Setaria viridis*-inspired electrode with polyaniline nanowire arrays aligned on MoO<sub>3</sub>@polypyrrole core-shell nanobelts**

**Ying Liu,<sup>a</sup> Le Li,<sup>a</sup> Jixin Zhu,<sup>b</sup> Jingsan Xu,<sup>c</sup> Siliang Liu,<sup>a</sup> Yufeng Wang,<sup>a</sup> Chao Zhang\*<sup>a</sup> and Tianxi Liu\*<sup>a</sup>**

<sup>a</sup> State Key Laboratory for Modification of Chemical Fibers and Polymer Materials, College of Materials Science and Engineering, Innovation Center for Textile Science and Technology, Donghua University, Shanghai 201620, P. R. China

<sup>b</sup> Shaanxi Institute of Flexible Electronics (SIFE), Northwestern Polytechnical University (NPU), 127 West Youyi Road, Xi'an 710072, China

<sup>c</sup> School of Chemistry, Physics and Mechanical Engineering, Queensland University of Technology, Brisbane, QLD 4001, Australia

\* E-mail: czhang@dhu.edu.cn (C. Zhang)

\* E-mail: txliu@fudan.edu.cn or txliu@dhu.edu.cn (T. X. Liu)

## Electronic Supplementary Information

### Figure captions:

**Fig. S1** SEM images of the MoO<sub>3</sub> powder after grinding at (a) low and (b) high magnifications, respectively.

**Fig. S2** SEM images of (a) MoO<sub>3</sub>/PPy-1 and (b) MoO<sub>3</sub>/PPy-3.

**Fig. S3** SEM images of neat PPy.

**Fig. S4** SEM images of neat PANI.

**Fig. S5** Schematic illustration of the formation of MoO<sub>3</sub>/PANI/PPy composites.

**Fig. S6** SEM images of (a) MoO<sub>3</sub>/PANI-1, (b) MoO<sub>3</sub>/PANI-2 and (c) MoO<sub>3</sub>/PANI-3.

**Fig. S7** TEM images of (a, b) MoO<sub>3</sub>/PANI-2 and (c, d) MoO<sub>3</sub>/PANI/PPy composites at low and high magnifications, respectively.

**Fig. S8** SEM images of MoO<sub>3</sub>/PANI/PPy composites at (a) low and (b) high magnifications, respectively.

**Fig. S9** (a) Comparison of CV curves of MoO<sub>3</sub>/PPy-1, MoO<sub>3</sub>/PPy-2 and MoO<sub>3</sub>/PPy-3 at a scan rate of 10 mV s<sup>-1</sup>. (b) Specific capacitances of MoO<sub>3</sub>/PPy-1, MoO<sub>3</sub>/PPy-2 and MoO<sub>3</sub>/PPy-3 at various current densities.

**Fig. S10** (a) Comparison of CV curves of MoO<sub>3</sub>/PANI-1, MoO<sub>3</sub>/PANI-2 and MoO<sub>3</sub>/PANI-3 at a scan rate of 10 mV s<sup>-1</sup>. (b) Specific capacitances of MoO<sub>3</sub>/PANI-1, MoO<sub>3</sub>/PANI-2 and MoO<sub>3</sub>/PANI-3 at various current densities.

**Fig. S11** CV curves of MoO<sub>3</sub>/PANI/PPy electrode at various scan rates of 5, 20, 50, 100 and 200 mV s<sup>-1</sup>, respectively.

**Fig. S12** TGA curves of MoO<sub>3</sub>, MoO<sub>3</sub>/PPy and MoO<sub>3</sub>/PPy/PANI in air.

**Fig. S13** Specific capacitances of MoO<sub>3</sub>/PANI/PPy at various current densities.

**Fig. S14** Self-discharge measurement of the supercapacitor based on the two-electrode MoO<sub>3</sub>/PPy/PANI electrodes

**Fig. S15** Galvanostatic charge/discharge curves of MoO<sub>3</sub>, PANI, PPy, MoO<sub>3</sub>/PANI, MoO<sub>3</sub>/PPy, MoO<sub>3</sub>/PPy/PANI electrodes for 3000 charge/discharge cycles at a current density of 2 A g<sup>-1</sup>.

**Fig. S16** (a) Cycling stability of the MoO<sub>3</sub>/PPy/PANI electrode after 20000 charge/discharge cycles at 10 A g<sup>-1</sup>. The corresponding galvanostatic charge/discharge curves of the MoO<sub>3</sub>/PPy/PANI electrodes for (b) 101~110 and (c) 19991~20000 charge/discharge cycles at a current density of 10 A g<sup>-1</sup>.

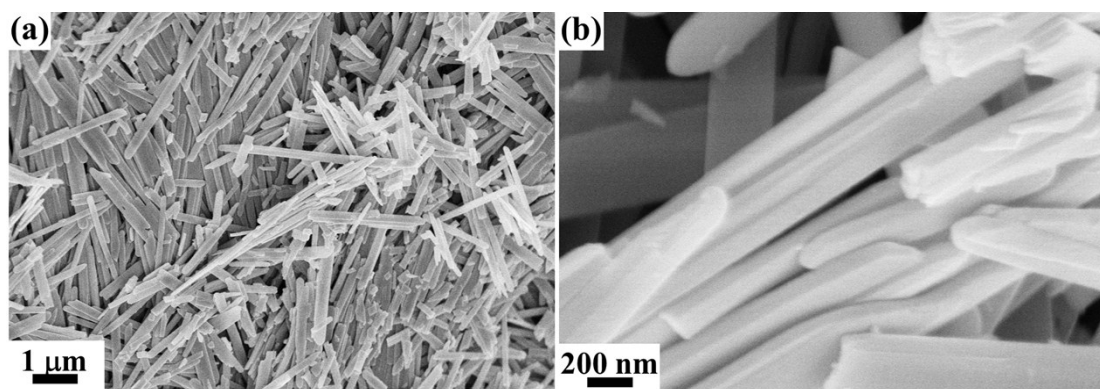

**Fig. S1** SEM images of the  $\text{MoO}_3$  powder after grinding at (a) low and (b) high magnifications, respectively.

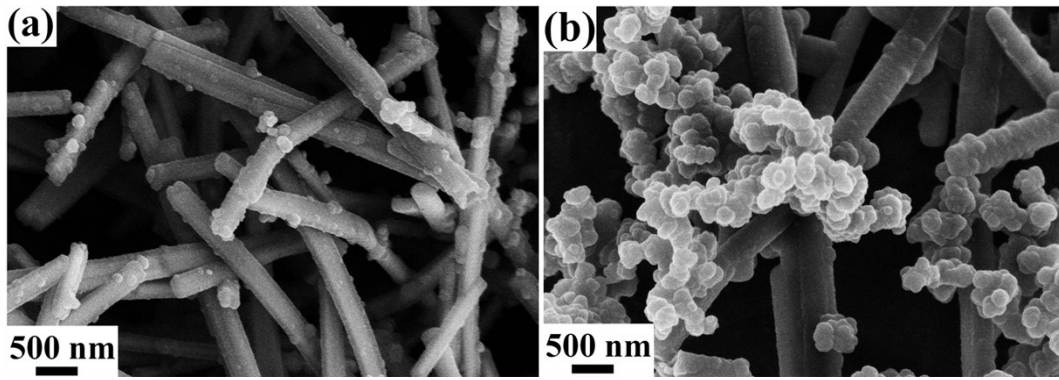

**Fig. S2** SEM images of (a) MoO<sub>3</sub>/PPy-1 and (b) MoO<sub>3</sub>/PPy-3.

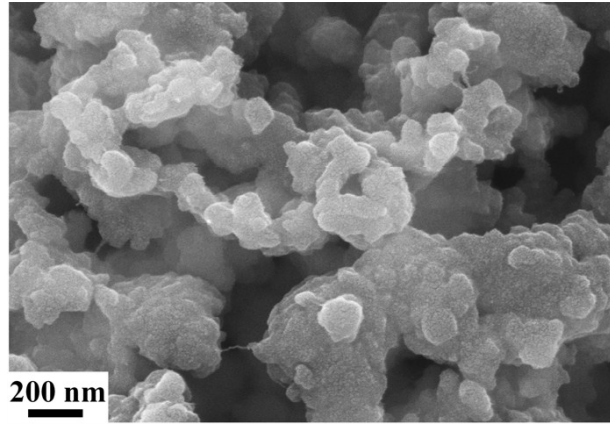

**Fig. S3** SEM images of neat PPy.

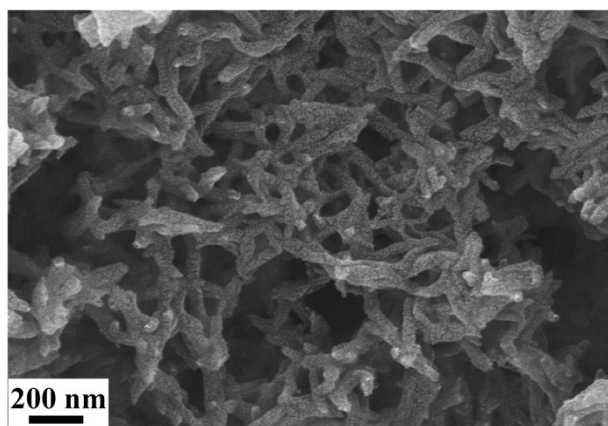

**Fig. S4** SEM images of neat PANI.

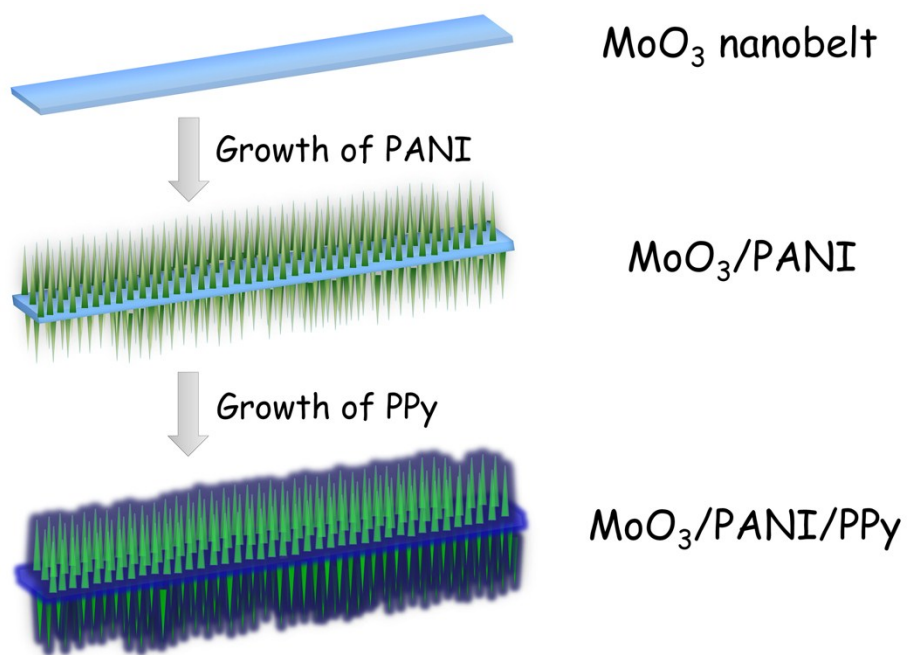

**Fig. S5** Schematic illustration of the formation of  $\text{MoO}_3/\text{PANI}/\text{PPy}$  composites.

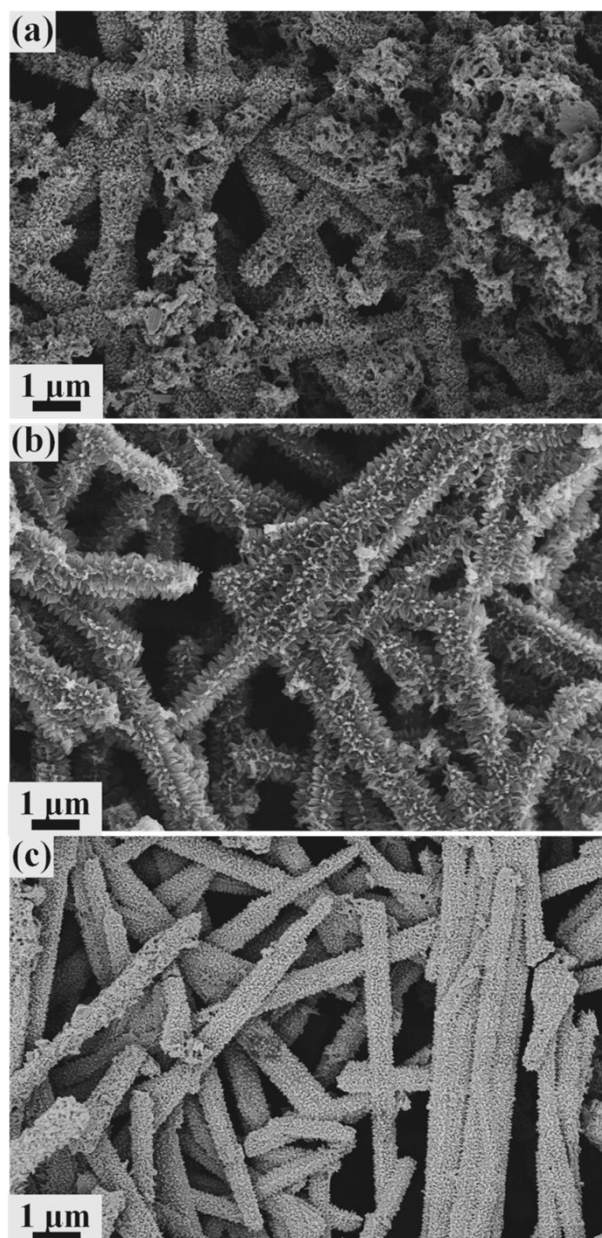

**Fig. S6** SEM images of (a) MoO<sub>3</sub>/PANI-1, (b) MoO<sub>3</sub>/PANI-2 and (c) MoO<sub>3</sub>/PANI-3.



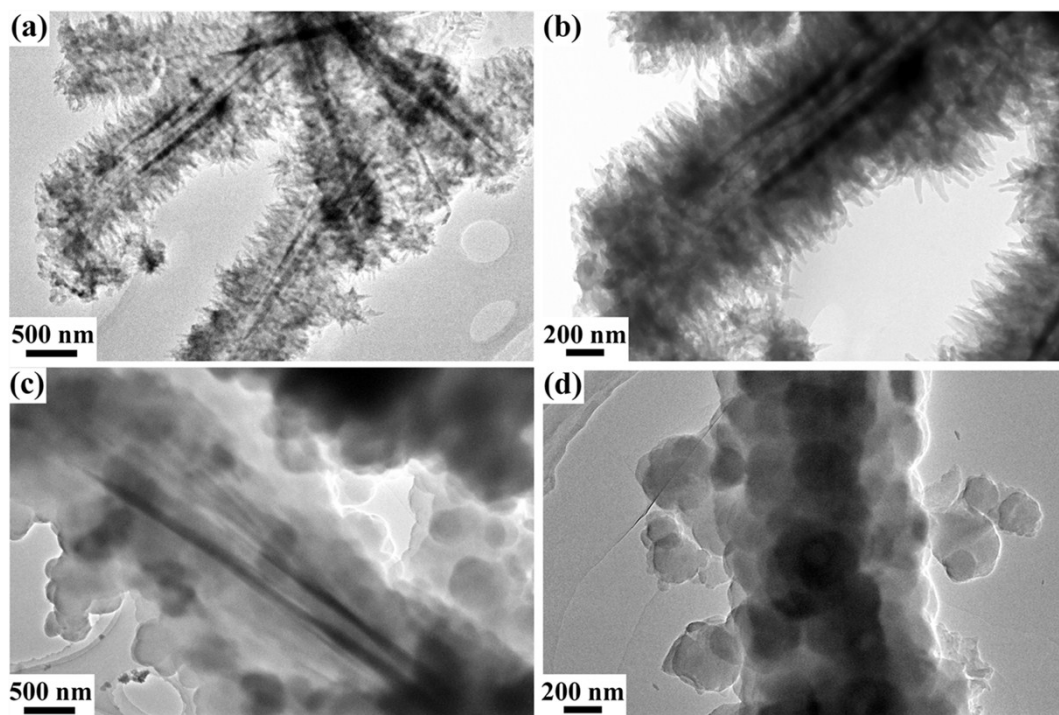

**Fig. S7** TEM images of (a, b) MoO<sub>3</sub>/PANI-2 and (c, d) MoO<sub>3</sub>/PANI/PPy composites at low and high magnifications, respectively.

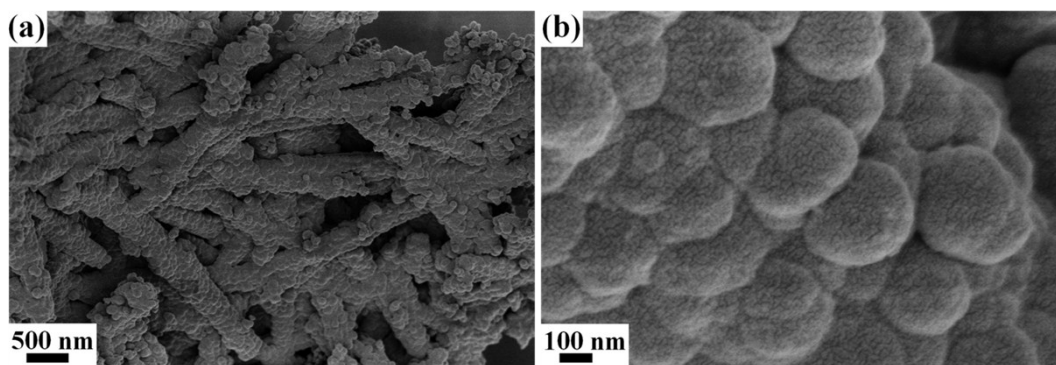

**Fig. S8** SEM images of MoO<sub>3</sub>/PANI/PPy composites at (a) low and (b) high magnifications, respectively.

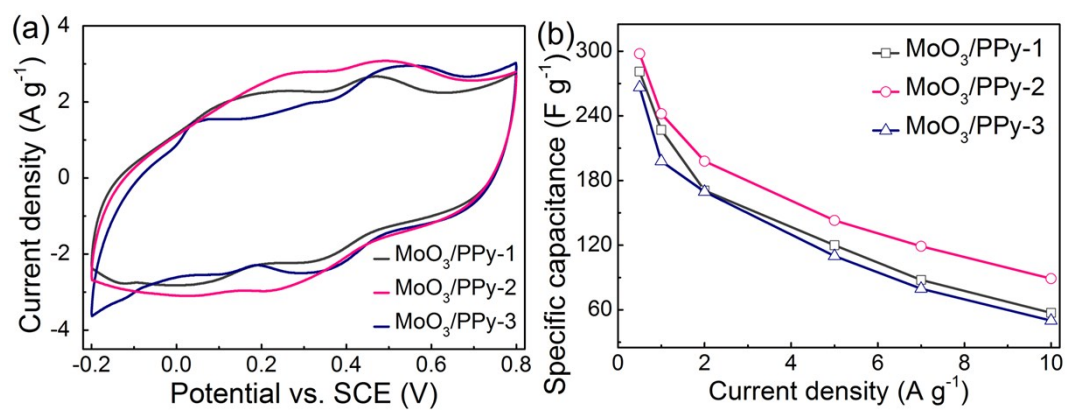

**Fig. S9** (a) Comparison of CV curves of MoO<sub>3</sub>/PPy-1, MoO<sub>3</sub>/PPy-2 and MoO<sub>3</sub>/PPy-3 at a scan rate of 10 mV s<sup>-1</sup>. (b) Specific capacitances of MoO<sub>3</sub>/PPy-1, MoO<sub>3</sub>/PPy-2 and MoO<sub>3</sub>/PPy-3 at various current densities.

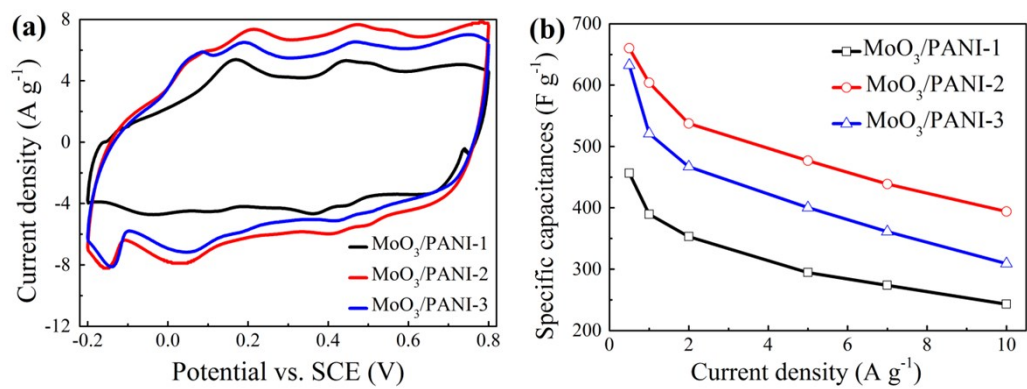

**Fig. S10** (a) Comparison of CV curves of MoO<sub>3</sub>/PANI-1, MoO<sub>3</sub>/PANI-2 and MoO<sub>3</sub>/PANI-3 at a scan rate of 10 mV s<sup>-1</sup>. (b) Specific capacitances of MoO<sub>3</sub>/PANI-1, MoO<sub>3</sub>/PANI-2 and MoO<sub>3</sub>/PANI-3 at various current densities.

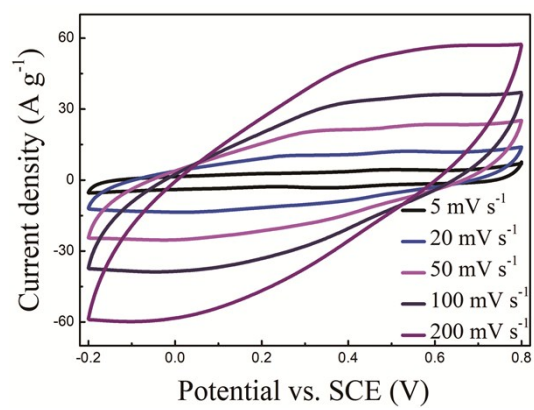

**Fig. S11** CV curves of MoO<sub>3</sub>/PANI/PPy electrode at various scan rates of 5, 20, 50, 100 and 200 mV s<sup>-1</sup>, respectively.

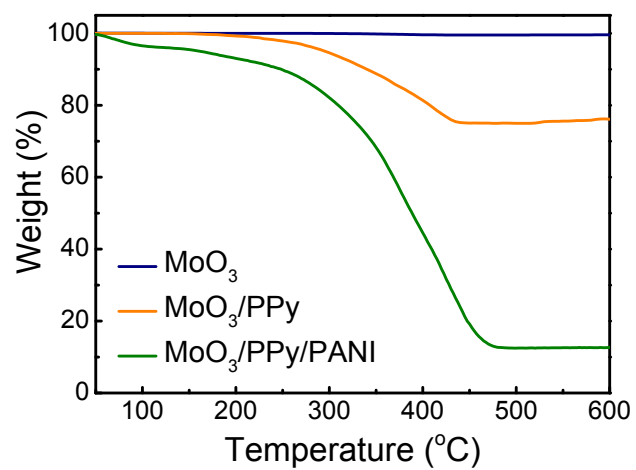

**Fig. S12** TGA curves of MoO<sub>3</sub>, MoO<sub>3</sub>/PPy and MoO<sub>3</sub>/PPy/PANI in air.

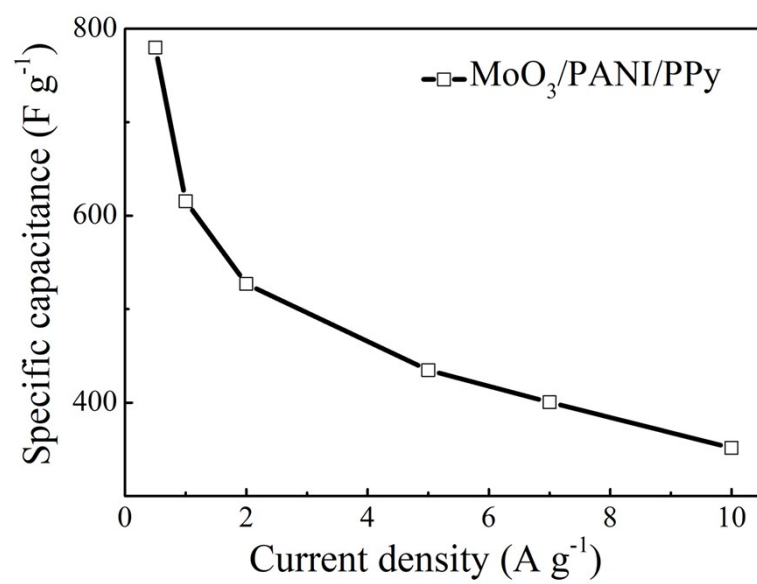

**Fig. S13** Specific capacitances of MoO<sub>3</sub>/PANI/PPy at various current densities.

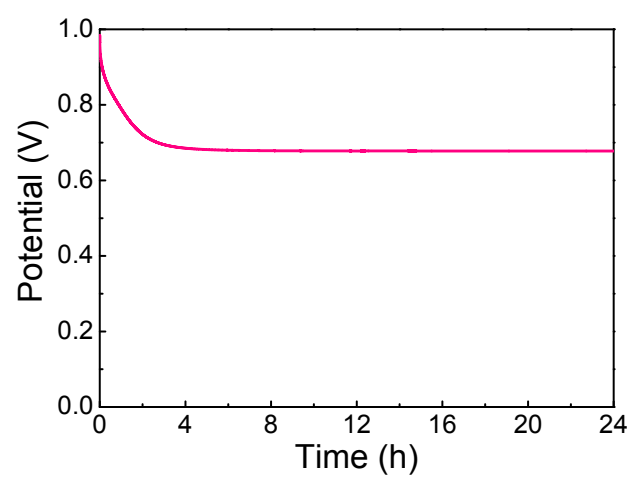

**Fig. S14** Self-discharge measurement of the supercapacitor based on the two-electrode MoO<sub>3</sub>/PPy/PANI electrodes



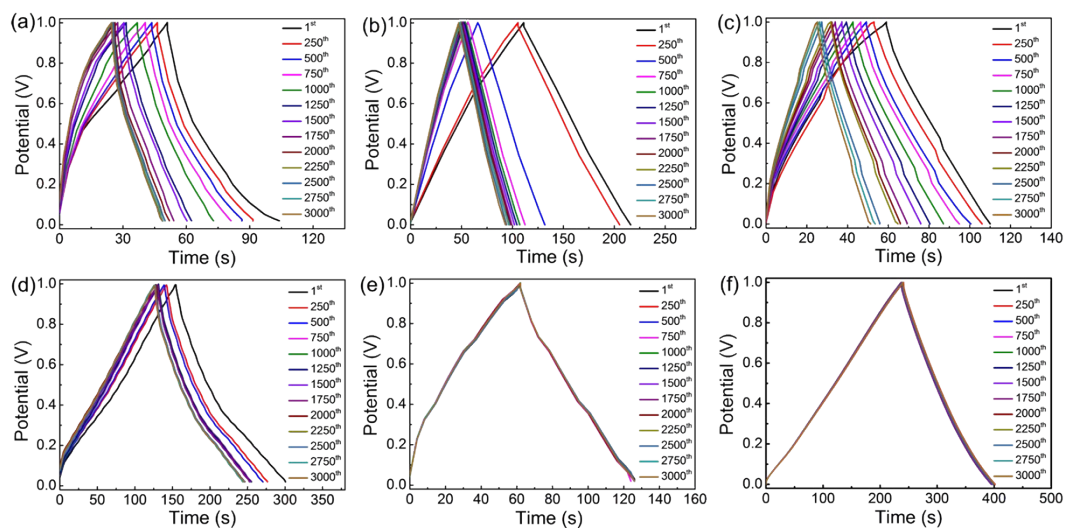

**Fig. S15** Galvanostatic charge/discharge curves of MoO<sub>3</sub>, PANI, PPy, MoO<sub>3</sub>/PANI, MoO<sub>3</sub>/PPy, MoO<sub>3</sub>/PPy/PANI electrodes for 3000 charge/discharge cycles at a current density of 2 A g<sup>-1</sup>.

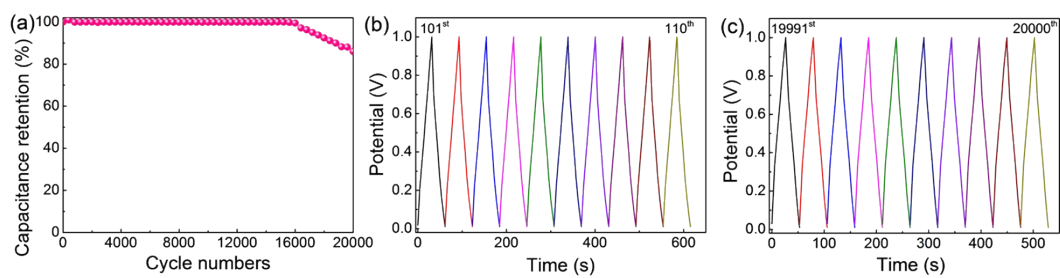

**Fig. S16** (a) Cycling stability of the MoO<sub>3</sub>/PPy/PANI electrode after 20000 charge/discharge cycles at 10 A g<sup>-1</sup>. The corresponding galvanostatic charge/discharge curves of the MoO<sub>3</sub>/PPy/PANI electrodes for (b) 101~110 and (c) 19991~20000 charge/discharge cycles at a current density of 10 A g<sup>-1</sup>.
